# Supplementary material for: A Novel Multiprotein Bridging Factor 1-Like Protein Induces Cyst Wall Protein Gene Expression and Cyst Differentiation in Giardia lamblia
Source: MDPI journal article supplement (doi:10.3390/ijms22031370), 2021-01-29
Supplement: s1 [file s1]

Figure S1

A

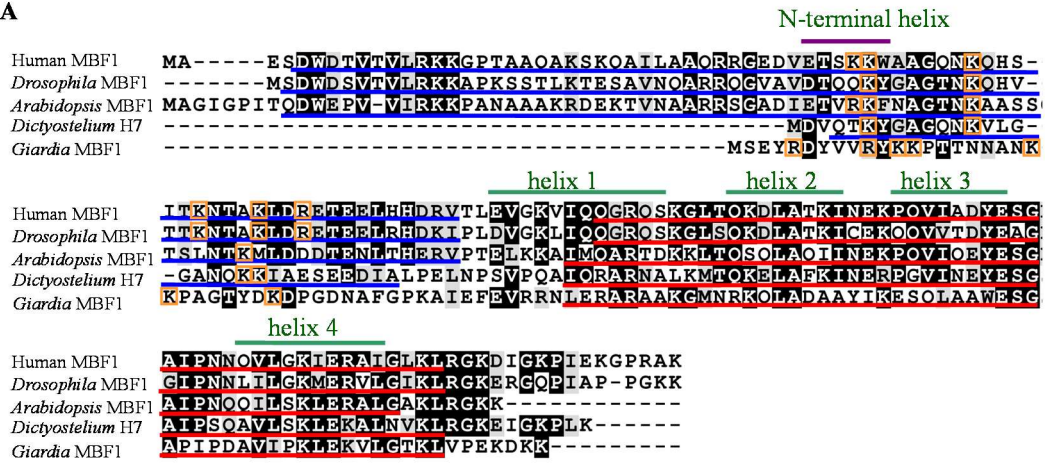

B

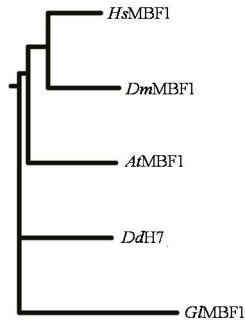

**Fig. S1. MBF1 sequence alignment and phylogenetic analysis.** (A) Alignment of the MBF1 proteins. The MBF1 proteins from different organisms, including human, *Drosophila*, *Arabidopsis*, *Dictyostelium* and *Giardia*, are analyzed by ClustalW 1.83 with all default settings. GenBank *accession* numbers for human MBF1, *Drosophila* MBF1, *Arabidopsis* MBF1, *Dictyostelium* H7, and *Giardia* MBF1 are NP\_003783.1, NP\_524110.1, NP\_565981.1, CAA33444.1, and XP\_001704109.1, respectively. Black boxes, gray boxes and hyphens indicate identical amino acids, conserved amino acids and gaps in the respective proteins, respectively. The predicted HTH domains and MBF1 domains of various MBF1 proteins are indicated by red and blue underlines, respectively. No MBF1 domain was predicted for *Giardia* MBF1. The predicted N terminal  $\alpha$  helix and basic amino acids of *Giardia* MBF1 are indicated by a purple line and orange boxes, respectively. (B) Phylogenetic analysis of the MBF1 proteins. A neighbor-joining phylogenetic tree was obtained from alignment of MBF1 proteins from various organisms as described. The bootstrap values determined from 1000 trees are not shown. Values are higher than 400.

**Figure S2**

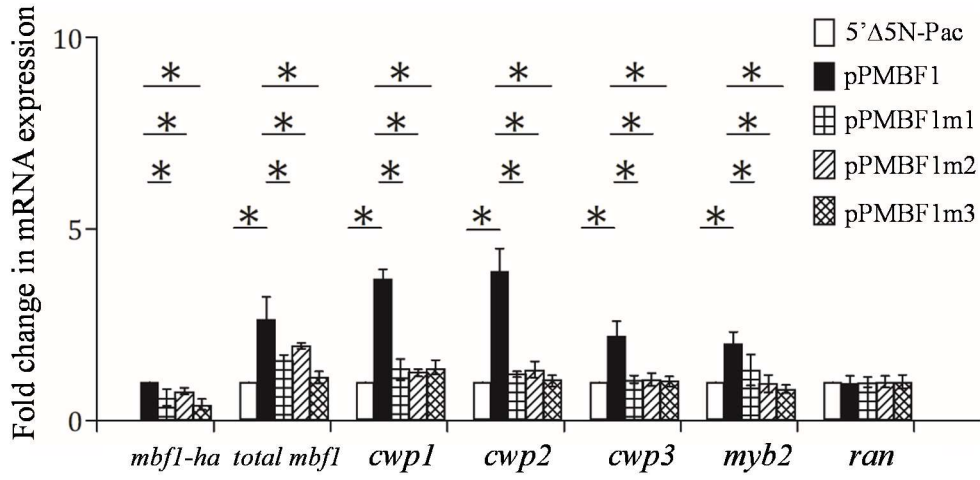

**Fig. S2. Induction of *cwp1-3* and *myb2* gene expression in the MBF1-overexpressing cell line during encystation.** The 5'Δ5N-Pac, pPMBF1, and pPMBF1m1-3 stable transfectants were cultured in encystation medium for 24h and then subjected to quantitative real-time RT-PCR analysis using primers specific for *mbf1-ha*, *mbf1*, *cwp1*, *cwp2*, *myb2*, *ran*, and 18S ribosomal RNA genes, respectively, as described in Fig. 3C.

Figure S3

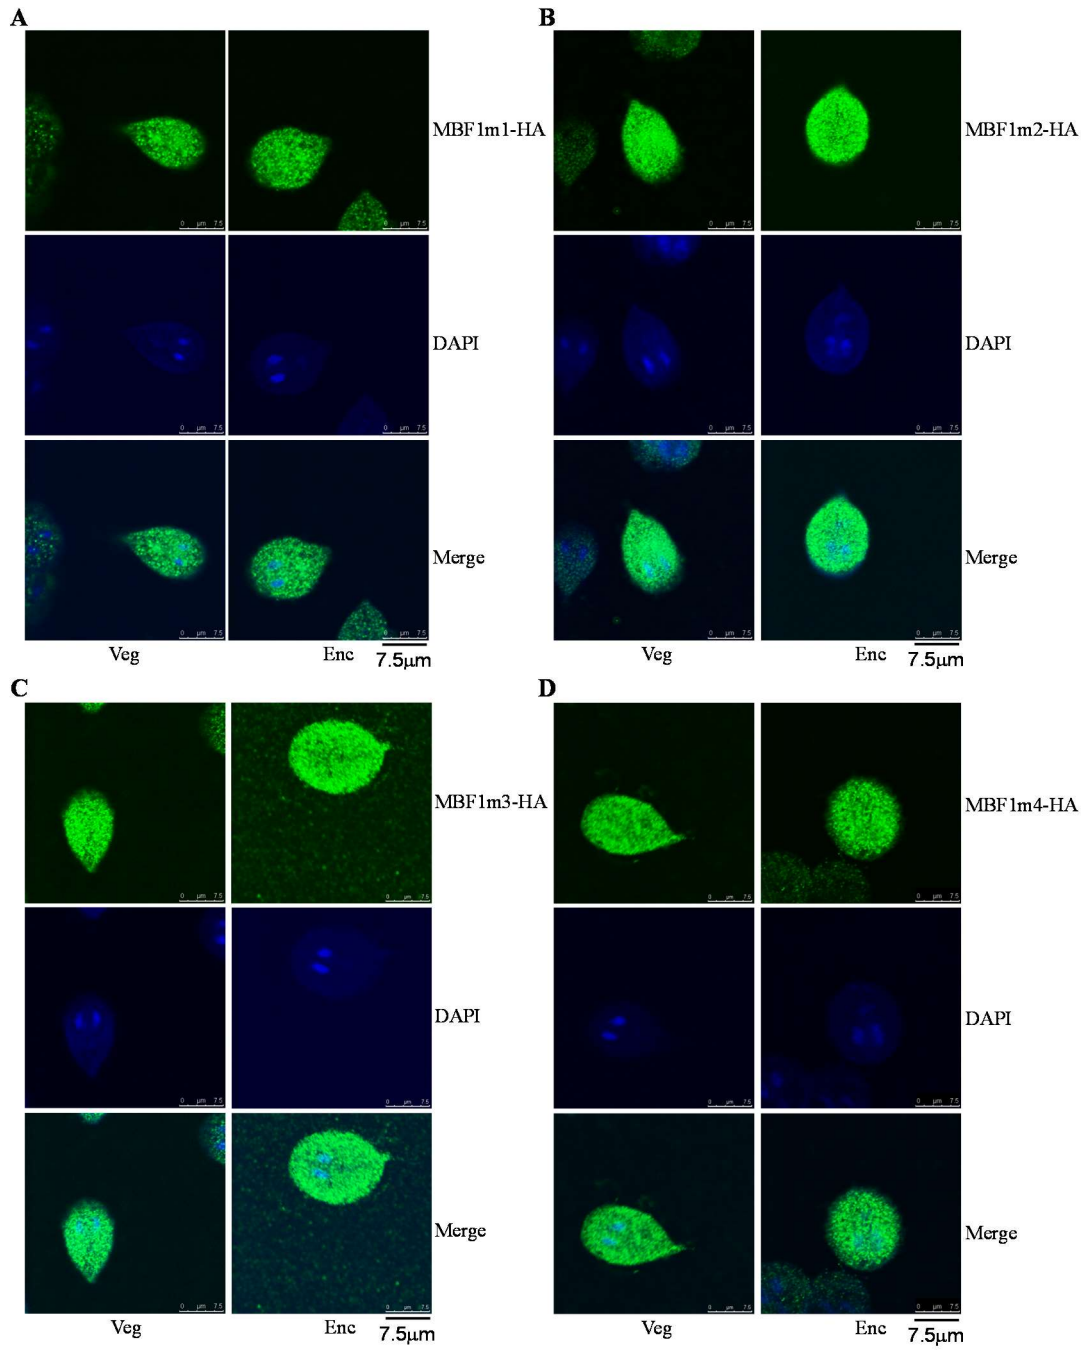

**Fig. S3. Immunofluorescence analysis of MBF1m1-4 distribution.** The pPMBF1m1-4 stable transfectants were cultured and then subjected to immunofluorescence analysis as described in Fig. 2E. The upper panels show the localization of the HA-tagged MBF1m1-4. The middle panels show the DAPI staining of cell nuclei. The bottom panels show the merged images.



**Fig. S4. Prediction of secondary structure of MBF1 mutants.** The mutated region of MBF1m1-4 is indicated by blue boxes. The secondary structure of MBF1 and MBF1m1-4 was predicted by NPS analysis. H indicates the  $\alpha$ -helix.



**Figure S5**

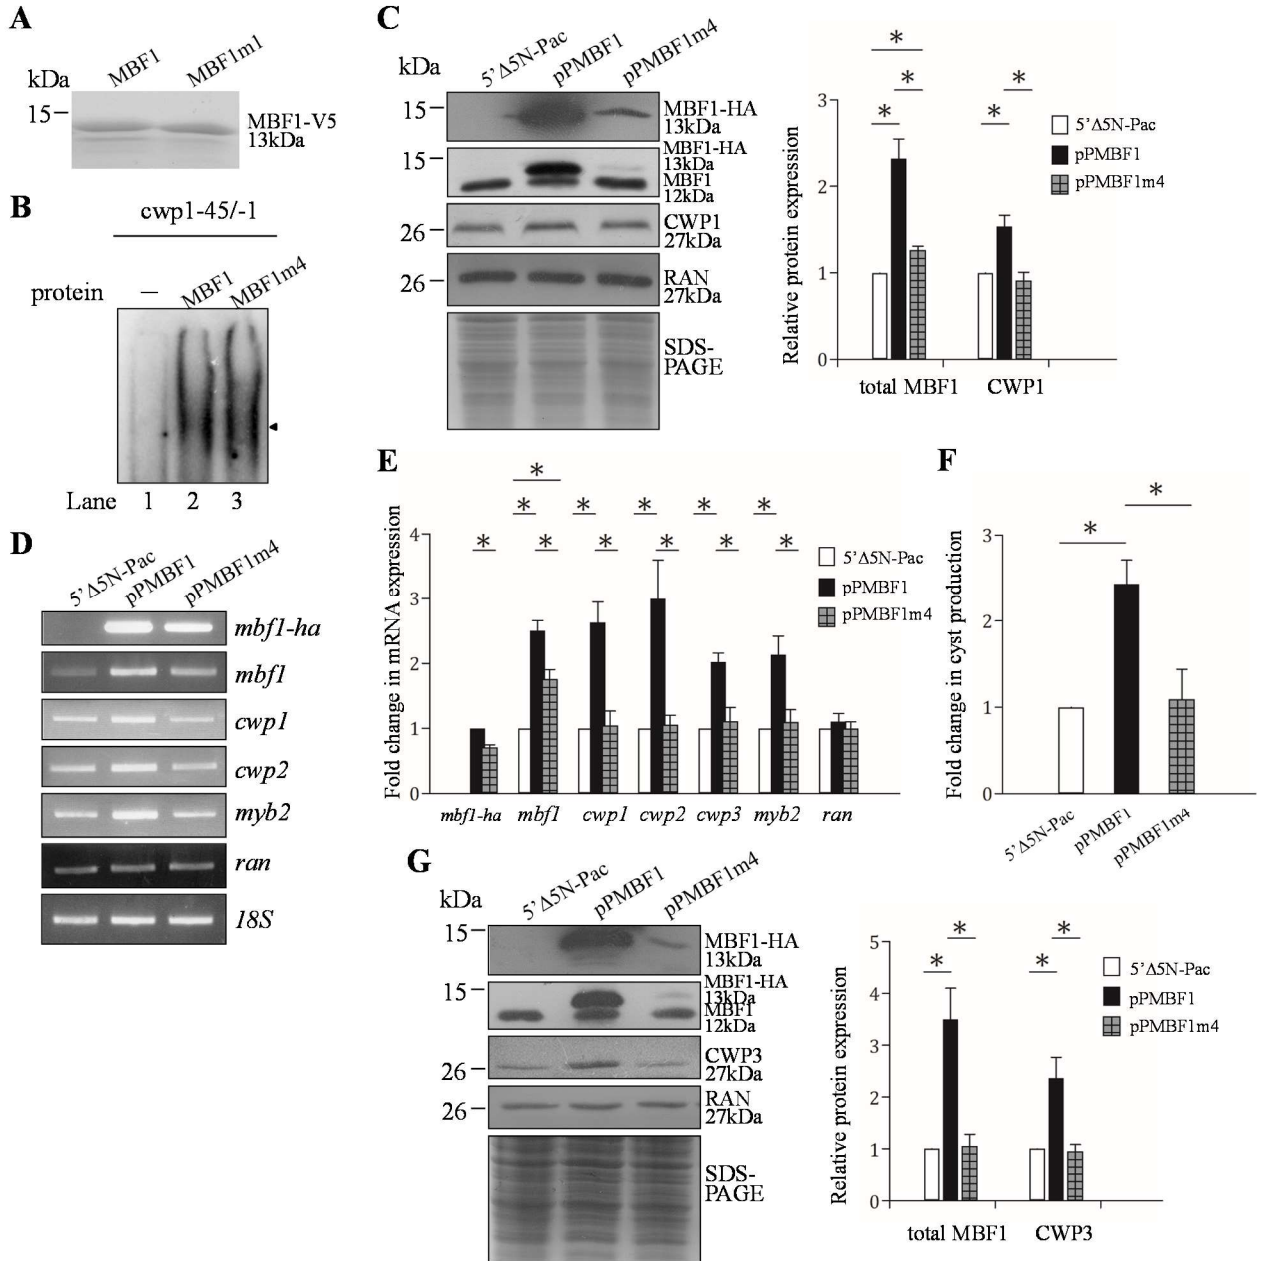

**Fig. S5. Analysis of MBF1m4.** (A) SDS-PAGE analysis of recombinant MBF1 and MBF1m4 proteins. MBF1 or MBF1m4 protein with a C-terminal V5 tag was purified from *E. coli* by affinity chromatography and then analyzed by SDS-PAGE and silver staining. (B) MBF1m4 has DNA-binding ability. Electrophoretic mobility shift assays were performed using purified MBF1 and MBF1m4, and *cwp1-45/-1* probe. The arrowhead indicates the shifted complex. (C) Expression of MBF1m4 decreased the level of CWP1 protein. The 5'Δ5N-Pac, pPMBF1, and pPMBF1m4 stable transfectants were cultured in growth medium and then subjected to SDS-PAGE and Western blot. The blot was probed by anti-HA, anti-MBF1, anti-CWP1, and anti-Ran antibodies, respectively. The intensity of bands from three Western blot assays was quantified as described in Fig. 3A. (D) RT-PCR analysis of gene expression in the MBF1- and MBF1m4- expressing cell lines. The 5'Δ5N-Pac, pPMBF, and pPMBF1m4 stable transfectants were cultured in growth medium and then subjected to RT-PCR analysis using primers specific for *mbf1-ha*, *mbf1*, *cwp1*, *cwp2*, *myb2*, and 18S ribosomal RNA genes, respectively. (E) Quantitative real-time PCR analysis of gene expression in the MBF1- and MBF1m4- expressing cell lines. Real-time PCR was performed using primers specific for *mbf1-ha*, *mbf1*, *cwp1*, *cwp2*, *cwp3*, *myb2*, *ran*, and 18S ribosomal RNA genes, respectively, as described in Fig. 3C. (F) Expression of MBF1m4 decreased the level of cyst generation. The 5'Δ5N-Pac, pPMBF1, and pPMBF1m4 stable transfectants were cultured in growth medium and then subjected to cyst count as described under “Materials and Methods” and Fig. 3D. (G) Expression of MBF1m4 decreased the level of CWP3 protein during encystation. The 5'Δ5N-Pac, pPMBF1, and pPMBF1m4 stable transfectants were cultured in encystation medium for 24h and then subjected to SDS-PAGE and Western blot. The blot was probed by anti-HA, anti-MBF1, anti-CWP3, and anti-Ran

antibodies, respectively. The intensity of bands from three Western blot assays was quantified as described in Fig. 3A.

Figure S6

ATGGGCACCGAGTACAAGCCCACGGTGCGCCTCGCCACCCGCGACGACGTCCCCGGGGCCG  
TACGCACCCTCGCCGCCGCGTTCGCCGACTACCCCGCCACGCGCCACACCGTCGACCCGGA  
CCGCCACATCGAGCGGGTCACCGAGCTGCAAGAACTCTTCCTCACGCGCTCGGGCTCGAC  
ATCGGCAAGGTGTGGGTTCGCGGACGACGGCGCCGCGGTGGCGGTCTGGACCACGCCGGAGA  
GCGTCGAAGCGGGGGCGGTGTTGCCGAGATCGGCCCGCGCATGGCCGAGTTGAGCGGTTC  
CCGGCTGGCCGCGCAGCAACAGATGGAAGGCCTCCTGGCGCCGACCCGGCCCAAGGAGCCC  
GCGTGGTTCTCGCCACCGTCGCGCTCTCGCCGACCACCAGGGCAAGGGTCTGGGCAGCG  
CCGTCGTGCTCCCGGAGTGGAGGCGGCCGAGCGCGCCGGGGTGCCCGCCTTCCTGGAGAC  
CTCCGCGCCCCGCAACCTCCCTTCTACGAGCGGCTCGGCTTACCGTCACCGCCGACGTC  
GAGTGCCCG**AAGGACCGCGCGACCTGGT**GCATGACCCGCAAGCCCGGTGCCCTCGAGTGA**g**  
ggcttgtgcattgctactactgagtctacttgagggtggatgcatctacactctgacttcg  
gctttgatctttcagacacctcaaaggctgtaactgtgtaaacagatgcgctttcttgag  
agataacccttacaagctctgcctatgaatgccttgtccttgctcacatgtaacagaacg  
gcttagtcaagaggccattgaataattaaccatgagaggcttcacgttcagcgtcggcgg  
gggctgccggaatgctcctgtcgactttggaccgtgtagagcagggacttccacggtgata  
gagttctctttagctccacgctctctgtaagcgtaaacgtagcatctcaaatttgccac  
ggcacattgatgctgttcccaagcaatttatctcaatccctcgagcaagatgaatgtgaa  
gttcacatgggtctcaaaggataactaaatttcaaatcctcaacgaaactctgaatggtgaa  
agccagaagtcagtgacgcaccttgtgctcttgggcttagcaactgagaaggaactgaaca  
tcttttttcggcatccaatgagaagctctacttttctgtattttgggtcgg**ccccgagacttt**  
**ctttgtcca**

**Fig. S6. Replacement of the *mbfl* gene with the *pac* gene in the MBF1td cell line confirmed by PCR and sequencing.** Genomic DNA was isolated from MBF1td and control cell lines cultured in growth medium. PCR was performed using primers specific for *pac* (PCR2 in Fig. 8A), which are PCR2F for bold region 1 and PCR2R for bold region 2, to verify the integration of the *pac* gene into the correct region in genomic DNA. The sequence results obtained from the PCR2 product are shown as underlined letters. Capital letters indicate the coding sequence for *pac* gene, which starts at ATG and stops at TGA. This indicates the replacement of the *mbfl* gene with the *pac* gene. The region used to clone the *mbfl* 3' region into the pMBF1td plasmid for HR is shown in red, which is also between the sequence of MBF13XF and MBF13KR. The underlined and lower case letters, which are downstream and outside of the red region of MBF13XF and MBF13KR, indicate that HR occurred in the sequence of *mbfl* 3' region and that the *pac* gene was integrated in the genomic DNA.

**Figure S7**

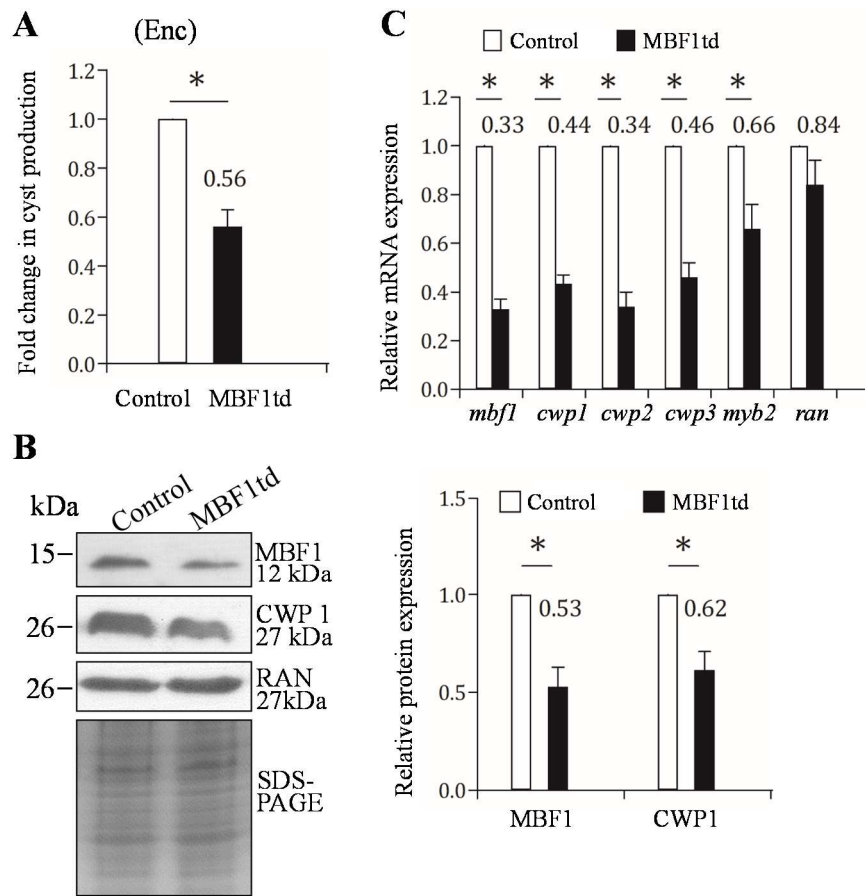

**Fig. S7. Decrease in expression of *cwp1-3*, and *myb2* by targeted disruption of the *mbf1* gene during encystation.** (A) Cyst generation decreased by targeted disruption of the *mbf1* gene in the MBF1td cell line during encystation. The control and MBF1td cell lines were cultured in encystation medium for 24h (Enc) and then subjected to cyst count as described under “Materials and Methods” and Fig. 3D. (B) Targeted disruption of the *mbf1* gene decreased the CWP1 level in the MBF1td cell line during encystation. The control and MBF1td cell lines were cultured in encystation medium for 24h and then subjected to SDS-PAGE and Western blot analysis as described in Fig. 3A. The blot was probed with anti-MBF1, anti-CWP1, and anti-RAN antibodies, respectively. The intensity of bands from three Western blot assays was quantified as described in Fig. 3A. (C) Decrease in expression of *cwp1-3*, and *myb2* by targeted disruption of the *mbf1* gene in the MBF1td cell line during encystation. The control and MBF1td cell lines were cultured in encystation medium for 24h and then subjected to quantitative real-time RT-PCR analysis using primers specific for *mbf1*, *cwp1*, *cwp2*, *cwp3*, *myb2*, *ran*, and 18S ribosomal RNA genes, respectively, as described in Fig. 2A.

**Figure S8**

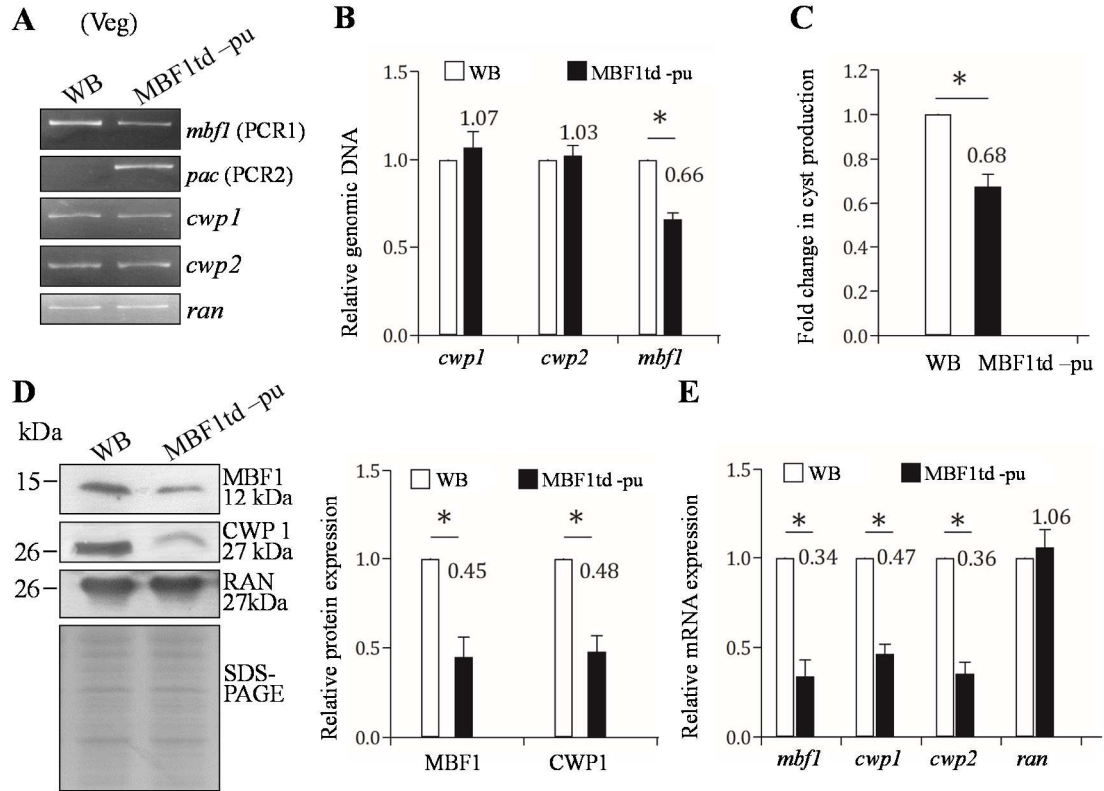



**Fig. S8. Decrease in expression of *cwp1* and *cwp2* by targeted disruption of the *mbf1* gene after the removal of puromycin during vegetative growth.** (A) Partial replacement of the *mbf1* gene with the *pac* gene in the MBF1 –pu cell line confirmed by PCR. Puromycin was removed from the MBF1td and control cell lines to obtain the MBF1td –pu and control –pu cell lines, respectively. Genomic DNA was isolated from MBF1td –pu and control –pu cell lines cultured in growth medium (vegetative growth, Veg). PCR was performed using primers specific for *mbf1* (PCR1), *pac* (PCR2), *cwp1*, *cwp2*, and *ran* genes, respectively, as described in Fig. 8B. (B) Partial disruption of the *mbf1* gene in the MBF1td –pu cell line confirmed by real-time PCR. Real-time PCR was performed using genomic DNA and primers specific for *mbf1*, *cwp1*, *cwp2*, and *ran* genes, respectively, as described in Fig. 8C. (C) Cyst generation decreased by targeted disruption of the *mbf1* gene in the MBF1td –pu cell line during vegetative growth. The control –pu and MBF1td –pu cell lines were cultured in growth medium and then subjected to cyst count as described under “Materials and Methods” and Fig. 3D. (D) Targeted disruption of the *mbf1* gene decreased the CWP1 level in the MBF1td –pu cell line during vegetative growth. The control –pu and MBF1td –pu cell lines were cultured in growth medium and then subjected to SDS-PAGE and Western blot analysis as described in Fig. 3A. The blot was probed with anti-MBF1, anti-CWP1, and anti-RAN antibodies, respectively. The intensity of bands from three Western blot assays was quantified as described in Fig. 3A. (E) Decrease in expression of *cwp1* and *cwp2* by targeted disruption of the *mbf1* gene in the MBF1td –pu cell line during vegetative growth. The control –pu and MBF1td –pu cell lines were cultured in growth medium and then subjected to quantitative real-time RT-PCR analysis using primers specific for *mbf1*, *cwp1*, *cwp2*, *ran*, and 18S ribosomal RNA genes, respectively, as described in Fig. 2A.

**Figure S9**

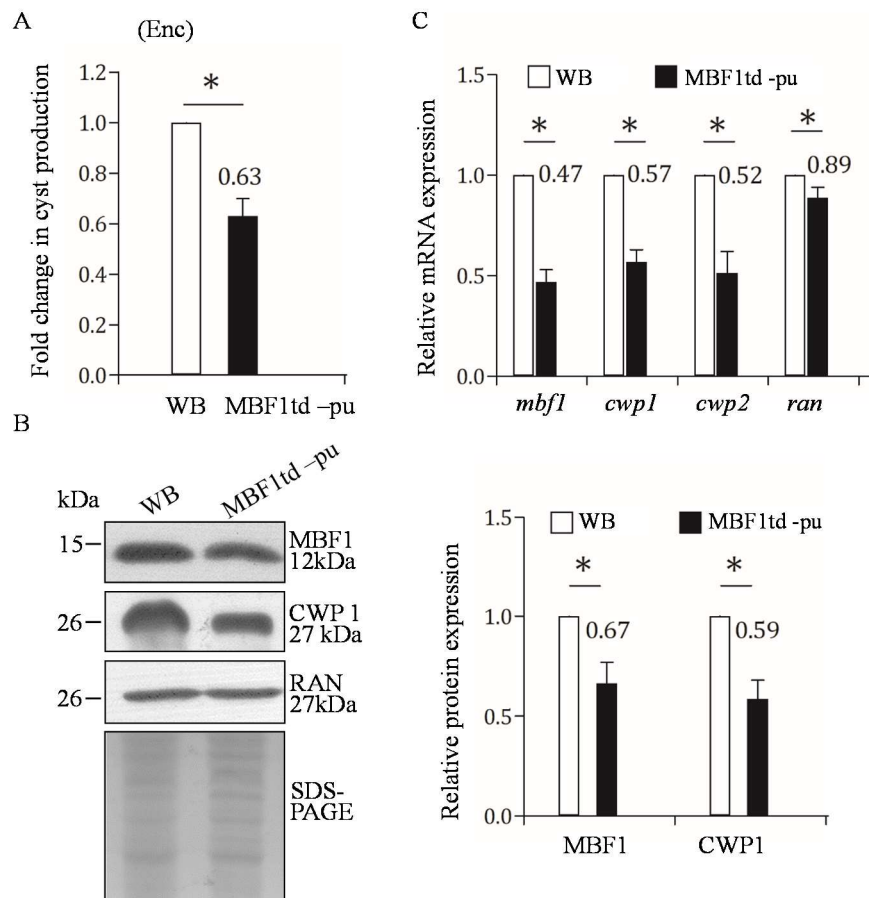

**Fig. S9. Decrease in expression of *cwp1* and *cwp2* by targeted disruption of the *mbf1* gene after the removal of puromycin during encystation.** (A) Cyst generation decreased by targeted disruption of the *mbf1* gene in the MBF1td –pu cell line during encystation. The control –pu and MBF1td –pu cell lines were cultured in encystation medium for 24h (Enc) and then subjected to cyst count as described under “Materials and Methods”, as described in Fig. 3D. (B) Targeted disruption of the *mbf1* gene decreased the CWP1 level in the MBF1td –pu cell line during encystation. The control –pu and MBF1td –pu cell lines were cultured in encystation medium for 24h and then subjected to SDS-PAGE and Western blot analysis as described in Fig. 3A. The blot was probed with anti-MBF1, anti-CWP1, and anti-RAN antibodies, respectively. The intensity of bands from three Western blot assays was quantified as described in Fig. 3A. (C) Decrease in expression of *cwp1* and *cwp2* by targeted disruption of the *mbf1* gene in the MBF1td –pu cell line during encystation. The control –pu and MBF1td –pu cell lines were cultured in encystation medium for 24h and then subjected to quantitative real-time RT-PCR analysis using primers specific for *mbf1*, *cwp1*, *cwp2*, *ran*, and 18S ribosomal RNA genes, respectively, as described in Fig. 2A.

**Table S1. Genes up or down regulated by MBF1 overexpression.**

| Number | Annotation                                   | Orf number | Fold change<br>(pPMBF1/5'Δ5N-Pac)* |
|--------|----------------------------------------------|------------|------------------------------------|
| 1      | VSP                                          | 41476      | 26.55                              |
| 2      | VSP                                          | 13402      | 21.92                              |
| 3      | VSP                                          | 14307      | 17.34                              |
| 4      | E2F1                                         | 23756      | 14.85                              |
| 5      | VSP                                          | 26590      | 11.23                              |
| 6      | VSP                                          | 13727      | 8.86                               |
| 7      | VSP                                          | 137614     | 8.16                               |
| 8      | VSP                                          | 105983     | 6.70                               |
| 9      | VSP                                          | 111873     | 6.02                               |
| 10     | VSP                                          | 114121     | 5.94                               |
| 11     | VSP, putative                                | 96055      | 5.47                               |
| 12     | Hypothetical protein                         | 117989     | 4.58                               |
| 13     | Hypothetical protein                         | 105786     | 3.68                               |
| 14     | High cysteine<br>membrane protein<br>Group 1 | 25816      | 3.66                               |
| 15     | Hypothetical protein                         | 9605       | 3.54                               |
| 16     | VSP, putative                                | 114286     | 3.15                               |
| 17     | VSP                                          | 124980     | 3.02                               |
| 18     | VSP                                          | 15206      | 2.97                               |
| 19     | VSP, putative                                | 92835      | 2.93                               |
| 20     | VSP                                          | 112113     | 2.48                               |
| 21     | Hypothetical protein                         | 15125      | 2.29                               |
| 22     | Hypothetical protein                         | 16078      | 2.23                               |
| 23     | VSP                                          | 114065     | 2.14                               |
| 24     | Hypothetical protein                         | 8960       | 2.17                               |
| 25     | Dynein heavy chain                           | 16804      | 2.10                               |
| 26     | Heat shock protein<br>HSP 90-alpha           | 98054      | 2.06                               |
| 27     | Hypothetical protein                         | 8505       | 1.95                               |
| 28     | Hypothetical protein                         | 9210       | 2.02                               |
| 29     | Kinase, NEK                                  | 137733     | 2.02                               |

|    |                                  |        |      |
|----|----------------------------------|--------|------|
| 30 | Ubiquitin-activating enzyme E1 1 | 6288   | 2.01 |
| 31 | DNA topoisomerase III $\alpha$   | 7615   | 0.03 |
| 32 | VSP                              | 40591  | 0.17 |
| 33 | VSP AS8                          | 13194  | 0.17 |
| 34 | VSP                              | 114672 | 0.17 |
| 35 | Hypothetical protein             | 99726  | 0.21 |
| 36 | VSP with INR                     | 119707 | 0.25 |
| 37 | VSP                              | 40571  | 0.26 |
| 38 | VSP                              | 90215  | 0.27 |
| 39 | VSP                              | 34357  | 0.27 |
| 40 | VSP                              | 105759 | 0.34 |
| 41 | Hypothetical protein             | 123980 | 0.35 |
| 42 | VSP with INR                     | 40592  | 0.35 |
| 43 | VSP                              | 34196  | 0.38 |
| 44 | VSP                              | 115047 | 0.43 |
| 45 | Hypothetical protein             | 114674 | 0.45 |
| 46 | VSP                              | 114653 | 0.46 |
| 47 | VSP                              | 116477 | 0.46 |
| 48 | Hypothetical protein             | 26442  | 0.47 |
| 49 | VSP                              | 36493  | 0.47 |
| 50 | Hypothetical protein             | 16697  | 0.48 |
| 51 | Hypothetical protein             | 13239  | 0.49 |
| 52 | VSP                              | 112678 | 0.49 |
| 53 | Elongation factor 1-gamma        | 12102  | 0.50 |

\**p* values were determined to be <0.05 for groups in which the average means changed by a factor of  $\geq 2.0$  or  $\leq 0.5$ .

**Table S2. Oligonucleotides used for construction of plasmids and PCR.**

| Name          | Sequence (5'--->3')           |
|---------------|-------------------------------|
| mbf1F (PCR1F) | CACCATGTCCGAGTATCGTGA CTAC    |
| mbf1R (PCR1R) | CTTCTTATCCTTCTCTGGGAC         |
| HAR           | AGCGTAATCTGGAACATCGTATGGGTA   |
| cwp1F         | ATGATGCTCGCTCTCCTT            |
| cwp1R         | TCAAGGCGGGGTGAGGCA            |
| cwp2F         | ATGATCGCAGCCCTTGTCTA          |
| cwp2R         | CCTTCTGCGGACAATAGGCTT         |
| cwp3F         | ATGTTTTCTCTGCTTCTTCT          |
| cwp3R         | TCTGTAGTAGGGCGGCTGTA          |
| myb2F         | ATGTTACCGGTACCTTCTCAGC        |
| myb2R         | GGGTAGCTTCTCACGGGGAAG         |
| ranF          | ATGTCTGACCCAATCAGC            |
| ranR          | TCAATCATCGTCGGGAAG            |
| mbf1realF     | CGACAAAGATCCCGGAGACA          |
| mbf1realR     | TTGCGACGCACTTCAA ACTC         |
| cwp1realF     | AACGCTCTCACAGGCTCCAT          |
| cwp1realR     | AGGTGGAGCTCCTTGAGAAATTG       |
| cwp2realF     | TAGGCTGCTTCCCACTTTTGAG        |
| cwp2realR     | CGGGCCCGCAAGGT                |
| cwp3realF     | GCAAATTGGATGCCAAACAA          |
| cwp3realR     | GACTCCGATCCAGTCGCAGTA         |
| myb2realF     | TCCCTAATGACGCCAAACG           |
| myb2realR     | AGCACGCAGAGGCCAAGT            |
| ranrealF      | TCGTCCTCGTCGGAAACAA           |
| ranrealR      | AACTGTCTGGGTGCGGATCT          |
| 18SrealF      | AAGACCGCTCTGTCAATCAA          |
| 18SrealR      | GTTTACGGCCGGAATACG            |
| mbf1KF        | ACCGTGGTACCCCTCTCTTGACAAAGGAG |

|            |                                                                                                                                                                                                                                                                                                                                                                                                                                                                                                                                                             |
|------------|-------------------------------------------------------------------------------------------------------------------------------------------------------------------------------------------------------------------------------------------------------------------------------------------------------------------------------------------------------------------------------------------------------------------------------------------------------------------------------------------------------------------------------------------------------------|
| mbf1MR     | CCGGCACGCGTCTTCTTATCCTTCTCTGG                                                                                                                                                                                                                                                                                                                                                                                                                                                                                                                               |
| top3βm1F   | ATGCAGCGTATATCGCGGGGAATGAGCCGGGCGATGGAAATGCGGGCTCTGCTCCC<br>AT                                                                                                                                                                                                                                                                                                                                                                                                                                                                                              |
| top3βm1R   | ATGGGAGCAGAGCCCGCATTTCCATCGCCCGGCTCATTCCTCCGCGATATACGCTGC<br>AT                                                                                                                                                                                                                                                                                                                                                                                                                                                                                             |
| top3βm2F   | CGAAGGGCATGAACGCGGAGCCGCCGGATAATGGGAGTGCGGGGAAGGAATCGCAG<br>CT                                                                                                                                                                                                                                                                                                                                                                                                                                                                                              |
| top3βm2R   | AGCTGCGATTCTTCCCGCACTCCCATTATCCGGCGGCTCCGCGTTCATGCCCTT<br>CG                                                                                                                                                                                                                                                                                                                                                                                                                                                                                                |
| top3βm3F   | CTCCCATTCTGATGATGGTGGTCTTCAACCTAATGCTGGTCTGGTACAAAGC                                                                                                                                                                                                                                                                                                                                                                                                                                                                                                        |
| top3βm3R   | GCTTTGTACCAGGACCAGCATTAGGTTGAAGACCACCATCATCAGGAATGGGAG                                                                                                                                                                                                                                                                                                                                                                                                                                                                                                      |
| top3βm4F   | GGGAATCCGGCTCTGATGCTGGTGTAAATGGCAACCTGCTGATTTGGAGAAGGTC<br>CT                                                                                                                                                                                                                                                                                                                                                                                                                                                                                               |
| top3βm4R   | AGGACCTTCTCAAATCAGCAGGTTGCCATTTAGCACCAGCATCAGAGCCGGATTC<br>CC                                                                                                                                                                                                                                                                                                                                                                                                                                                                                               |
| mbf15HF    | TCTGAAAGCTTCTCTAAAGT                                                                                                                                                                                                                                                                                                                                                                                                                                                                                                                                        |
| mbf15NR    | GGCGGCCATGGTTGTCACCAGGTCTTGAAAAC                                                                                                                                                                                                                                                                                                                                                                                                                                                                                                                            |
| mbf13XF    | GGCGGCTCGAGTGATGAGGGCTTGTGCATTGCTACTAC                                                                                                                                                                                                                                                                                                                                                                                                                                                                                                                      |
| mbf13KR    | GGCGGGGTACCGGATTGAGAATAAATTGCTTG                                                                                                                                                                                                                                                                                                                                                                                                                                                                                                                            |
| mbf1-guide | GAGAGCGGGTACCCTAGCTTATTGAAAAAGCGAGAGGCCATTGAGATGACTCGCCT<br>GATTGCAATAGCAAACAGTGTCTATAGTCTAATTGTGGACAACAGAGGGCTTATTG<br>CAACGTTGATGACCAAGTTCAACAAGGGCGTGCCTCCTATGAGCAGGTCATTCCG<br>AATTTGACGACCGGTAGCGTCCCAGAGTAAACCATTTTAAATTGAAATAGGCGG<br>TTGGAAATAAAAGCGCGCC <b>GTTTGAAGTGCGTCGCAACC</b> GTTTTAGAGCTAGAAAT<br>AGCAAGTTAAAATAAGGCTAGTCCGTTATCAACTTGAAAAAGTGGCACCGAGTCGG<br>TGCTTTTTTGAATTCGAGAGCG, underlined region is U6 promoter, bold region<br>is for annealing, underlined and bold region is upstream 3nt of PAM, other<br>region is scaffold RNA |
| PCR2F      | AAGGACCGCGCGACCTGG                                                                                                                                                                                                                                                                                                                                                                                                                                                                                                                                          |
| PCR2R      | tggacaaagaaagtctcgggc                                                                                                                                                                                                                                                                                                                                                                                                                                                                                                                                       |
| mbf15F     | GTGAACTAAGAGGACTAGCCAG                                                                                                                                                                                                                                                                                                                                                                                                                                                                                                                                      |
| mbf15R     | CAGGTCTTGAAAACAAAGGTCTTC                                                                                                                                                                                                                                                                                                                                                                                                                                                                                                                                    |
| 18S5F      | CCAAAAAGTGTGGTGCAGG                                                                                                                                                                                                                                                                                                                                                                                                                                                                                                                                         |
| 18S5R      | GCCGGGCGCGGGCGCCGCGG                                                                                                                                                                                                                                                                                                                                                                                                                                                                                                                                        |

---

|        |                                |
|--------|--------------------------------|
| cwp15F | CAACGGCTTACTAAATCATTCTCTTG     |
| cwp15R | TTCTGTGTTTCTTGATCTGAGAGTTGT    |
| cwp25F | CACTTTGATGAGAGCATGGG           |
| cwp25R | TTAGTTCATATCTTAAGTTA           |
| cwp35F | TGGGGGAGATAGGAGAATAC           |
| cwp35R | ATCAGTAGTAACTTATTTTTTGGGAAAGAC |
| myb25F | TGGCTATGTATTTTTTCTTCTTCTACAGCT |
| myb25R | TAGCAGTACAGAGTAATTATTATTTTAGTA |
| U65F   | TTGAGATGACTCGCCTGATTG          |
| U65R   | GAAATTCGAATGACCTGCTC           |

---
